# Supplementary material
Source: publisher site journal article supplement (https://www.degruyterbrill.com/publication/isbn/9783110287462/downloadAsset/9783110287462_Inhaltsverzeichnis.pdf)
Supplement: Supplementary file 1 [file 9783110287462_Inhaltsverzeichnis.pdf]

## Inhaltsverzeichnis

| Nr.                                                                                                                                                                                                | Seite |
|----------------------------------------------------------------------------------------------------------------------------------------------------------------------------------------------------|-------|
| 1    Datenschutz u. Scientology-Mitgliedschaft. VG Köln, Urteil vom 15.1.2009 (20 K 1673/07) .....                                                                                                 | 1     |
| 2    Ungleichbehandlung von standesamtlicher u. religiöser Eheschließung. EGMR, Urteil vom 20.1.2009 (No. 3976/05 - Şerife Yiğit ./ Türkiye) .....                                                 | 6     |
| 3    Keine Grundsteuerbefreiung für die Dienstwohnung eines sog. „Nur-Dekans“ der Ev. Kirche. Hessisches FG, Urteil vom 28.1.2009 (3 K 2219/07) .....                                              | 30    |
| 4    Fortbestand vertraglicher gemeindlicher Kirchenbaulast. BVerwG, Urteil vom 5.2.2009 (7 C 11/08) .....                                                                                         | 38    |
| 5    Mehrehe/Ehe auf Zeit u. dt. ordre public. VG Berlin, Urteil vom 16.2.2009 (24 A 273.08) .....                                                                                                 | 50    |
| 6    Moschee im allgemeinen Wohngebiet. VG Berlin, Urteil vom 18.2.2009 (19 A 355.04) .....                                                                                                        | 57    |
| 7    Abfindungsregelung im Sozialplan/Beschränkung eines anteiligen Weihnachtsgeldanspruchs im Jahr des Ausscheidens aus dem Arbeitsverhältnis. LAG Köln, Urteil vom 18.2.2009 (3 Sa 1420/08) .... | 65    |
| 8    Steuersatz für Sakralkunst. FG Baden-Württemberg, Urteil vom 2.3.2009 (10 352/09) .....                                                                                                       | 78    |
| 9    Erstattungsüberhang an Kirchensteuer. BFH, Beschluss vom 3.3.2009 (X B 145/08) .....                                                                                                          | 81    |
| 10   Kostenübernahme für Treppensteighilfe zum Besuch kirchlicher Veranstaltungen. Hessisches LSG, Urteil vom 3.3.2009 (L 1 KR 39/08) .....                                                        | 84    |
| 11   Passivlegitimation/Verwirkung f. Unterlassungsbegehren wegen Inhalt eines Arbeitspapiers im Religionsunterricht. VG Würzburg, Urteil vom 11.3.2009 (W 1 K 08.2273) .....                      | 88    |
| 12   Befreiung vom Wehr- und Zivildienst. EGMR, Urteil vom 12.3.2009 (No. 49686/99 - Gütl ./ Österreich) .....                                                                                     | 93    |
| 13   Abstimmungsverfahren zur Umwandlung einer Gemeinschaftsgrundschule in eine evangelische Bekenntnisschule. OVG Nordrhein-Westfalen, Beschluss vom 17.3.2009 (19 B 1314/07) .....               | 103   |
| 14   Karitative Einrichtung einer Religionsgemeinschaft iSd § 118 Abs. 2 BetrVG. LAG Düsseldorf, Beschluss vom 17.3.2009 (8 TaBV 76/08) ..                                                         | 115   |

|    |                                                                                                                                                                              |     |
|----|------------------------------------------------------------------------------------------------------------------------------------------------------------------------------|-----|
| 15 | „Werte brauchen Gott“ als Tatsachenbehauptung. LG Köln, Urteil vom 20.3.2009 (28 O 59/09) .....                                                                              | 131 |
| 16 | Befristungsdauer in kirchl. Arbeitsrechtsregelungen. BAG, Urteil vom 25.3.2009 (7 AZR 710/07) .....                                                                          | 138 |
| 17 | Gewerkschaften in kirchlichen Einrichtungen. ArbG Heilbronn, Urteil vom 26.3.2009 (7 Ca 28/09) .....                                                                         | 156 |
| 18 | Einschränkung der Religionsausübung durch Zuweisung eines Asylbewerbers an eine bestimmte Gemeinschaftsunterkunft. VG Ansbach, Urteil vom 27.3.2009 (AN 10 K 08.30467) ..... | 167 |
| 19 | Bemessungsgrundlage für Kirchensteuer in glaubensverschiedener Ehe. Thüringer FG, Urteil vom 31.3.2009 (2 K 648/08) .....                                                    | 169 |
| 20 | Veranstaltung einer Weltanschauungsgemeinschaft am Karfreitag. BayVGh, Urteil vom 7.4.2009 (10 BV 08.1494) .....                                                             | 174 |
| 21 | Befreiung von einer Klassenfahrt aus religiösen Gründen. VG Hamburg, Urteil vom 7.4.2009 (15 K 3337/08) .....                                                                | 194 |
| 22 | Grabgestaltung auf kirchlichem Friedhof. Niedersächsisches OVG, Beschluss vom 8.4.2009 (8 LA 6/09) .....                                                                     | 203 |
| 23 | Photovoltaikanlage auf Kirchendach. VG Ansbach, Urteil vom 8.4.2009 (AN 3 K 08.009819) .....                                                                                 | 207 |
| 24 | Übertritt vom Islam zum christlichen Glauben als Nachfluchtgrund. VG Augsburg, Urteil vom 14.4.2009 (Au 6 K 08.30098) .....                                                  | 217 |
| 25 | Abweichung von den AVR im Arbeitsvertrag. LAG Berlin-Brandenburg, Urteil vom 21.4.2009 (7 Sa 1821/08) .....                                                                  | 224 |
| 26 | Beihilfe für Erstkommunionfeier. BayLSG, Urteil vom 24.4.2009 (L 11 AS 125/0) .....                                                                                          | 235 |
| 27 | Vorläufiger Rechtsschutz bei Besetzung eines sog. Konkordatslehrstuhls. BayVGh, Beschluss vom 30.4.2009 (7 CE 09.66.662) .....                                               | 242 |
| 28 | Bigamische Imam-Ehe als Verstoß gegen die in Deutschland geltende Werteordnung. VG Karlsruhe, Urteil vom 30.4.2009 (9 K 4270/07) ...                                         | 252 |
| 29 | Zuordnung einer Stiftung zur Kirche. VGh Baden-Württemberg, Urteil vom 8.5.2009 (1 S 2859/06) .....                                                                          | 258 |
| 30 | Talaq-Scheidung unter Ahmadiyyas u. deutscher ordre public. OLG Frankfurt/M., Beschluss vom 11.5.2009 (5 WF 66/09) .....                                                     | 284 |
| 31 | Schmerzensgeldanspruch wegen kritischer Bemerkung über Kopftuch. LG Aurich, Beschluss vom 11.5.2009 (1 S 66/09) .....                                                        | 287 |

|    |                                                                                                                                                                          |     |
|----|--------------------------------------------------------------------------------------------------------------------------------------------------------------------------|-----|
| 32 | Förderung der jüdischen Kultusgemeinden in Brandenburg. BVerfG, Beschluss vom 12.5.2009 (2 BvR 890/06) .....                                                             | 290 |
| 33 | Moschee im Gewerbegebiet. VG Karlsruhe, Urteil vom 12.5.2009 (2 K 4011/08) .....                                                                                         | 316 |
| 34 | Verkehrssicherungspflicht in einem Kirchengebäude. LG Bochum, Urteil vom 15.5.2009 (4 O 476/08) .....                                                                    | 324 |
| 35 | Restitution einer Sache bei Widmung zu liturgischen Zwecken. BVerwG, Beschluss vom 19.5. 2009 (5 B 6/09) .....                                                           | 328 |
| 36 | Befreiung muslimischer Mädchen vom Schwimmunterricht. OVG Nordrhein-Westfalen, Beschluss vom 20.5.2009 (19 B 1362/08, 19 E 1161/08) .....                                | 333 |
| 37 | Befreiung muslimischer Mädchen vom Schwimmunterricht. VG Düsseldorf, Beschluss vom 26.5.2009 (18 L 695/09) .....                                                         | 341 |
| 38 | Sondervollzeitdiener der Zeugen Jehovas, Weiterversicherung nach AFG. BSG, Urteil vom 3.6.2009 (B 12 AL 1/08 R) .....                                                    | 344 |
| 39 | Revisibilität des kirchl. Versorgungsrechts. BVerwG, Beschluss vom 4.6.2009 (2 B 28/09) .....                                                                            | 349 |
| 40 | Einreisevisum für Imam. VG Berlin, Urteil vom 4.6.2009 (22 V 71.08) .....                                                                                                | 353 |
| 41 | Kündigung wegen Kirchenaustritts. ArbG Düsseldorf, Urteil vom 5.6.2009 (13 Ca 98/09) .....                                                                               | 359 |
| 42 | Kein Kontrahierungszwang für Basis-Krankenversicherungen eines religiös orientierten Versicherungsvereins a.G. BVerfG, Beschluss vom 10.6.2009 (1 BvR 825, 831/08) ..... | 367 |
| 43 | Bezugnahme auf Arbeitsordnung des kirchl. Arbeitgebers im Arbeitsvertrag. LAG Berlin-Brandenburg, Urteil vom 11.6.2009 (26 Sa 2299/08) .....                             | 379 |
| 44 | Arbeitszeit eines Organisten am Sonntag. LAG Köln, Urteil vom 15.6.2009 (5 Sa 179/09) .....                                                                              | 391 |
| 45 | Kirchgeld in glaubensverschiedener Ehe. FG Nürnberg, Urteil vom 18.6.2009 (6 K 49/2008) .....                                                                            | 397 |
| 46 | Sonderurlaub f. Bezirkskongress der Zeugen Jehovas. OVG Rheinland-Pfalz, Urteil vom 19.6.2009 (10 A 10042/09) .....                                                      | 407 |
| 47 | Kopftuchverbot für muslimische Erzieherin in einem kommunalen Kindergarten. LAG Baden-Württemberg, Urteil vom 19.6.2009 (7 Sa 84/0) .....                                | 415 |

|    |                                                                                                                                                                                         |     |
|----|-----------------------------------------------------------------------------------------------------------------------------------------------------------------------------------------|-----|
| 48 | Ausbildung zum Diakon und ihre Förderung. VG Bayreuth, Urteil vom 22.6.2009 (B 3 K 08.203) .....                                                                                        | 435 |
| 49 | Zur Zulässigkeit der Bestimmung des männlichen Vornamens Djehad. KG Berlin, Beschluss vom 30.6.2009 (1 W 93/07) .....                                                                   | 440 |
| 50 | Teilnahme muslimischer Schülerin am Schwimmunterricht - Verbindlichkeit einer elterlichen Einverständniserklärung. OVG Nordrhein-Westfalen, Beschluss vom 30.6.2009 (19 B 801/09) ..... | 444 |
